# Supplementary figures and images for: Effect of Functional Inhibition of BACE1 on Sensitization to γ-Irradiation in Cancer Cells
Source: MDPI journal article supplement (doi:10.3390/cimb46010028), 2024-01-02

Figure S1

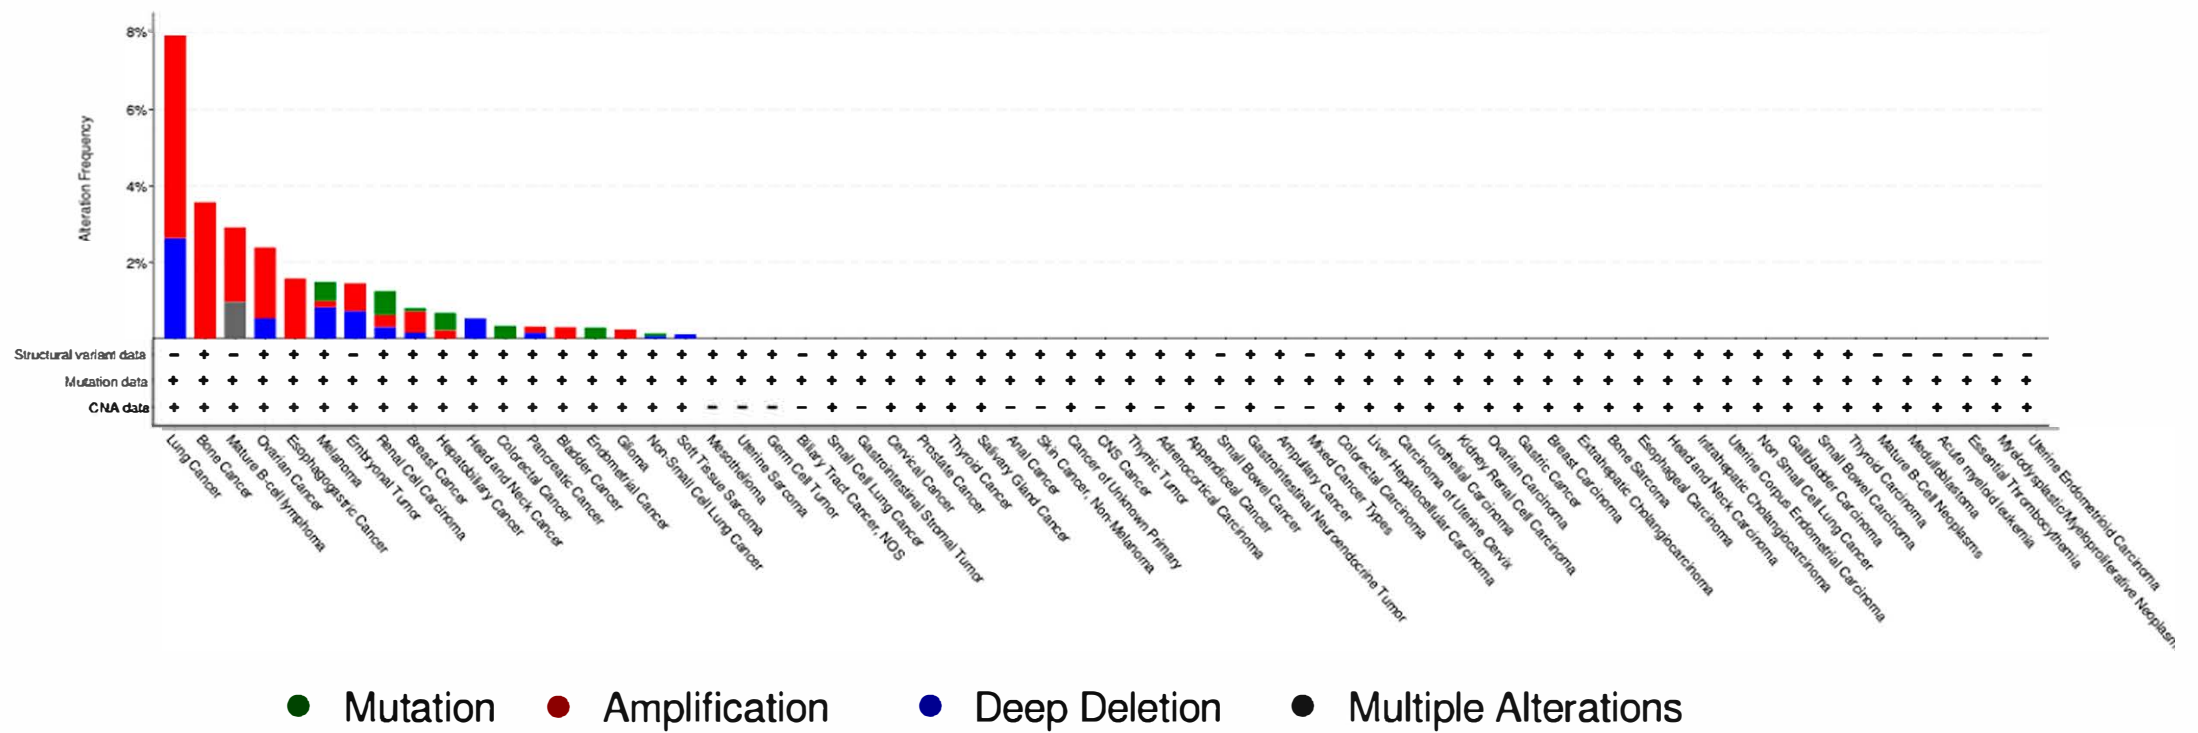

Supplement: s1 [file s1]
